# Supplementary material
Source: PubMed Central journal article supplement (PMC4206570)
Supplement: NIHMS622909-supplement-ESI.pdf [file NIHMS622909-supplement-ESI.pdf]

# Supporting Information

## Bimodal-hybrid heterocyclic amine targeting oxidative pathways and copper mis-regulation in Alzheimer's disease.

Paulina Gonzalez<sup>1</sup>, Viviana C.P. da Costa<sup>1</sup>, Kimberly Hyde<sup>1</sup>, Qiong Wu<sup>2</sup>, Onofrio Annunziata<sup>1</sup>, Josep Rizo<sup>2</sup>, Giridhar Akkaraju<sup>3</sup>, Kayla N. Green<sup>1\*</sup>

---

### Table of Contents.

**Figure S1.** Screening for biocompatibility of **cyclen** using the MTT assay, with 10 fold dilution concentrations, in HT-22 cell line.

**Figure S2.** Protective effect of **1** against A $\beta$  associated neurotoxicity in HT-22 cells in a 48 h. treatment using MTT assay. A $\beta$  15  $\mu$ M; **1** 50, 80, 100, 120  $\mu$ M.

**Figure S3.** Protective effect of **1** against copper associated neurotoxicity in HT-22 cells in a 48 h. treatment using MTT assay. CuCl<sub>2</sub> 15  $\mu$ M; **1** 50, 80, 100, 120  $\mu$ M.

**Figure S4.** Evaluation of GSH levels in HT-22 Neuronal Cells measured by GSH-Glo<sup>TM</sup> Kit: (a) Treatment of HT-22 neuronal cells with BSO results in a dose dependent decrease in GSH. (b) The addition of **1** at 80, 100, 120  $\mu$ M does not change GSH levels.

**Figure S5.** DCFH-DA Antioxidant assay of HT-22 neuronal cells after 12 hour exposure to A $\beta$  + Cu [15  $\mu$ M each, final conc.] followed by addition of **1**. n=8 for each sample. (Note: DCFH-DA interacts with free copper ions to give unreliable readings, therefore this control was excluded.)

**Table S1.** Calculated K<sub>ow</sub> values to determine BBB permeability of **cyclen**.

**Figure S6.** HSQC spectra of <sup>15</sup>N-A $\beta$ <sub>1-40</sub> (black) and <sup>15</sup>N-A $\beta$ <sub>1-40</sub> and **1** (1.5 eq.) (red). (a) full spectrum, (b) zoom of <sup>15</sup>N 120-125 ppm region and (c) change in intensity for residues in A $\beta$ <sub>1-40</sub> peptide in the presence of **1** when compared to <sup>15</sup>N-A $\beta$ <sub>1-40</sub> signal intensities alone.

**Experimental:** Details of Spectrophotometric determination of K (mM<sup>-1</sup>) for **cyclen** and **1**.

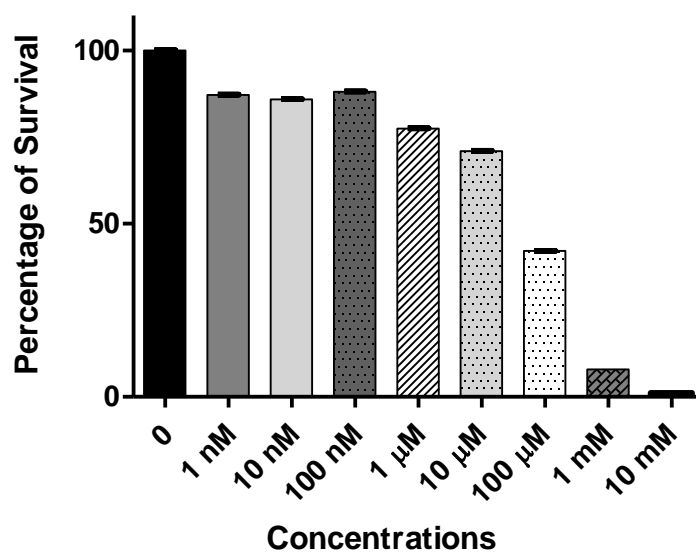

**Figure S1.** Screening for biocompatibility of **cyclexen** using the MTT assay, with 10 fold dilution concentrations, in HT-22 cell line.

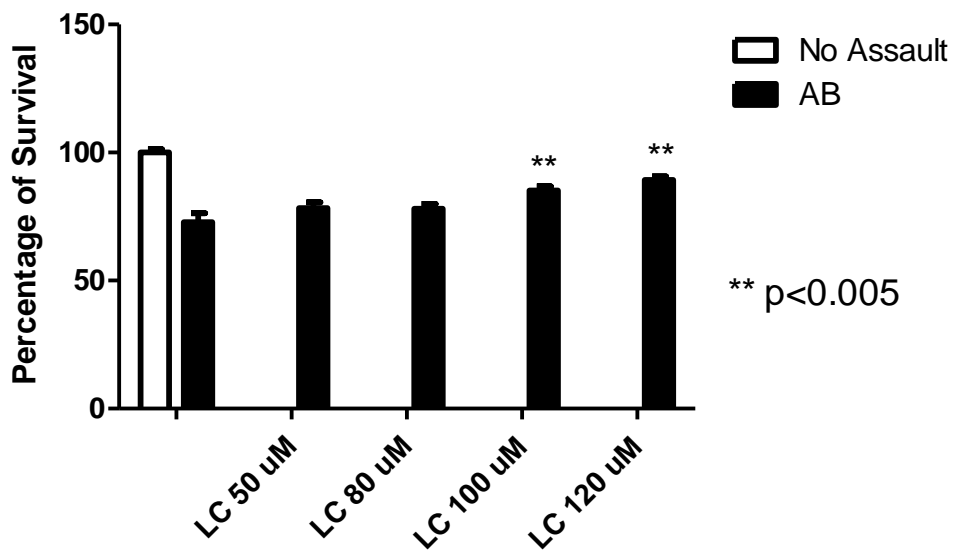

**Figure S2.** Protective effect of **1** against Aβ associated neurotoxicity in HT-22 cells in a 48 h. treatment using MTT assay. Aβ 15 μM; **1** 50, 80, 100, 120 μM.

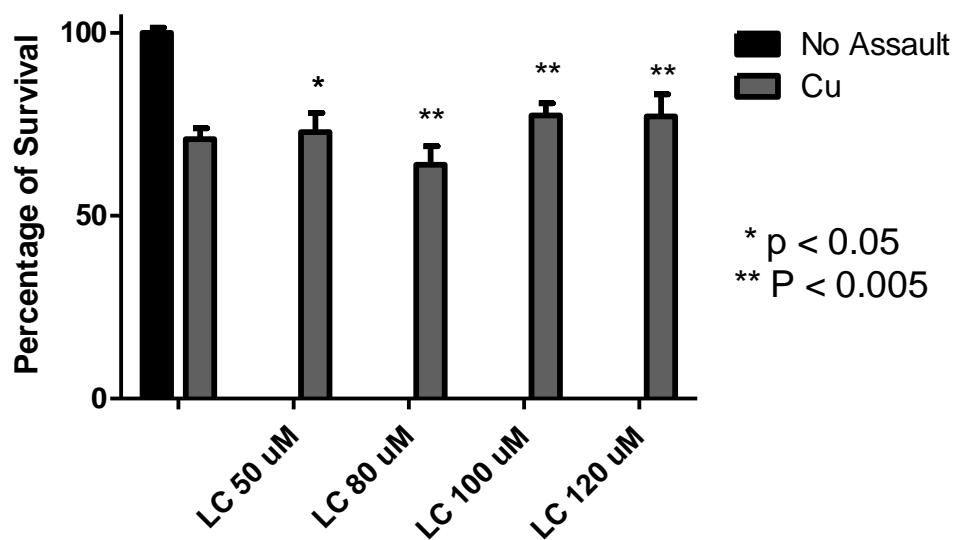

**Figure S3.** Protective effect of **1** against copper associated neurotoxicity in HT-22 cells in a 48 h. treatment using MTT assay. CuCl<sub>2</sub> 15 μM; **1** 50, 80, 100, 120 μM.

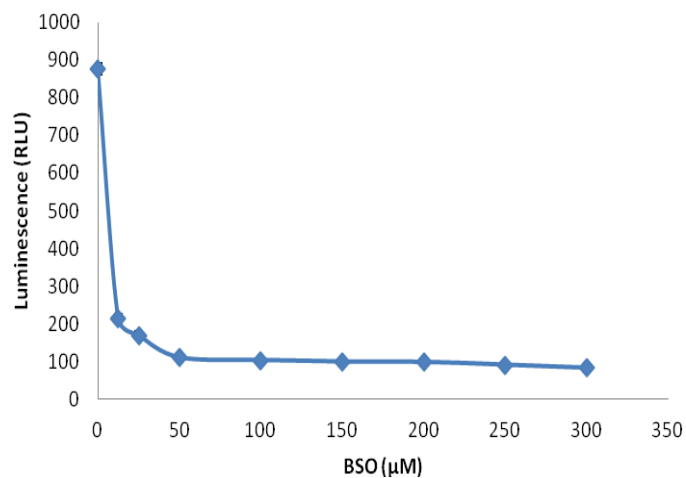

(a)

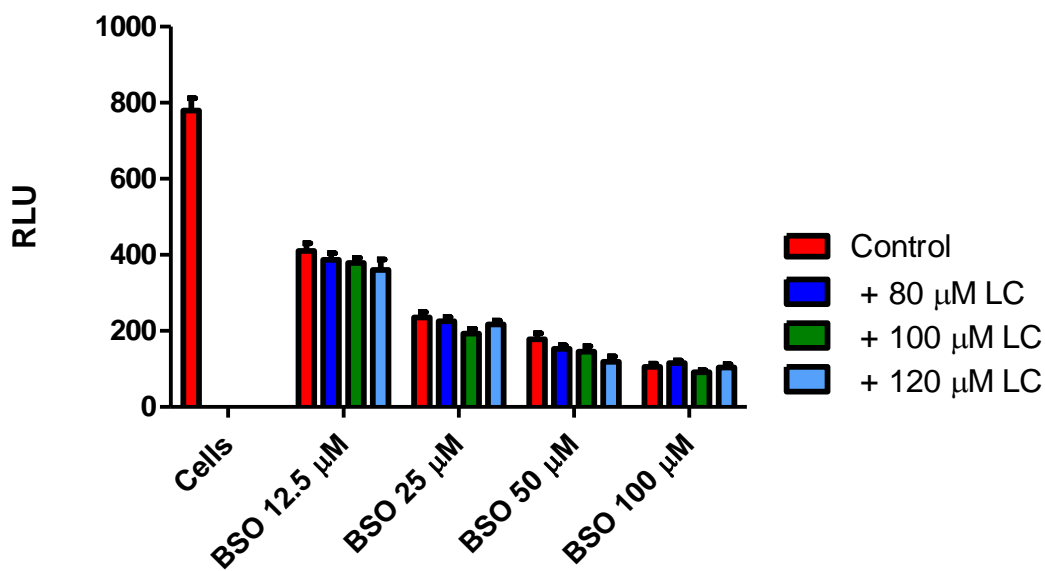

(b)

**Figure S4.** Evaluation of GSH levels in HT-22 Neuronal Cells measured by GSH-Glo™ Kit: (a) Treatment of HT-22 neuronal cells with BSO results in a dose dependent decrease in GSH. (b) The addition of **1** at 80, 100, 120  $\mu\text{M}$  does not change GSH levels.

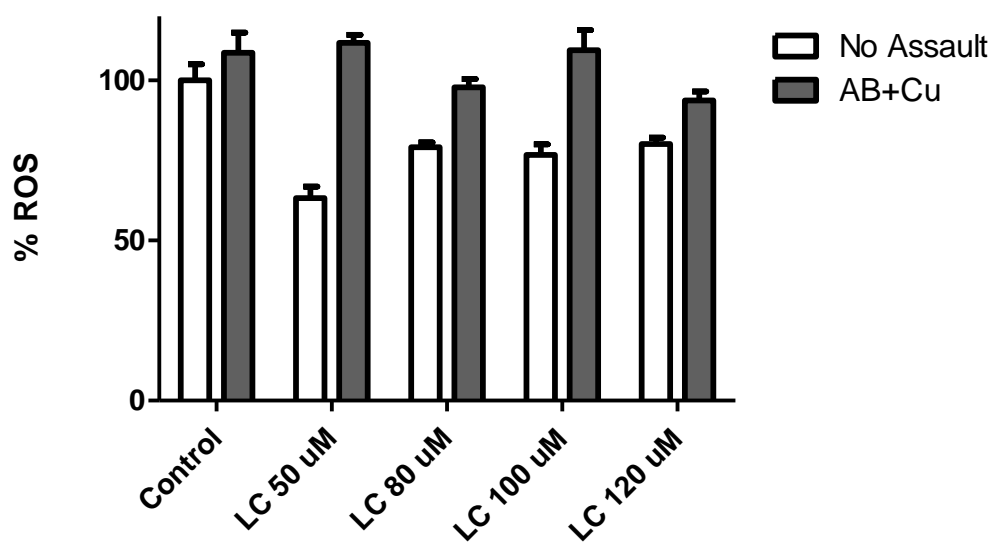

**Figure S5.** DCFH-DA Antioxidant assay of HT-22 neuronal cells after 12 hour exposure to A $\beta$  + Cu [15  $\mu$ M each, final conc.] followed by addition of **1**. n=8 for each sample. (Note: DCFH-DA interacts with free copper ions to give unreliable readings, therefore this control was excluded.)

| Log K <sub>ow</sub> fragment description | Coefficient | Value obtained for <b>1</b> |
|------------------------------------------|-------------|-----------------------------|
| -CH2- [aliphatic carbon]                 | 0.4911      | 3.9288                      |
| -NH- [aliphatic attach]                  | -1.4962     | -5.9848                     |
| Equation Constant                        |             | 0.2290                      |
| <b>LogK<sub>ow</sub></b>                 |             | <b>-1.8270</b>              |

**Table S1.** Calculated K<sub>ow</sub> values to determine BBB permeability of **cyclen**.

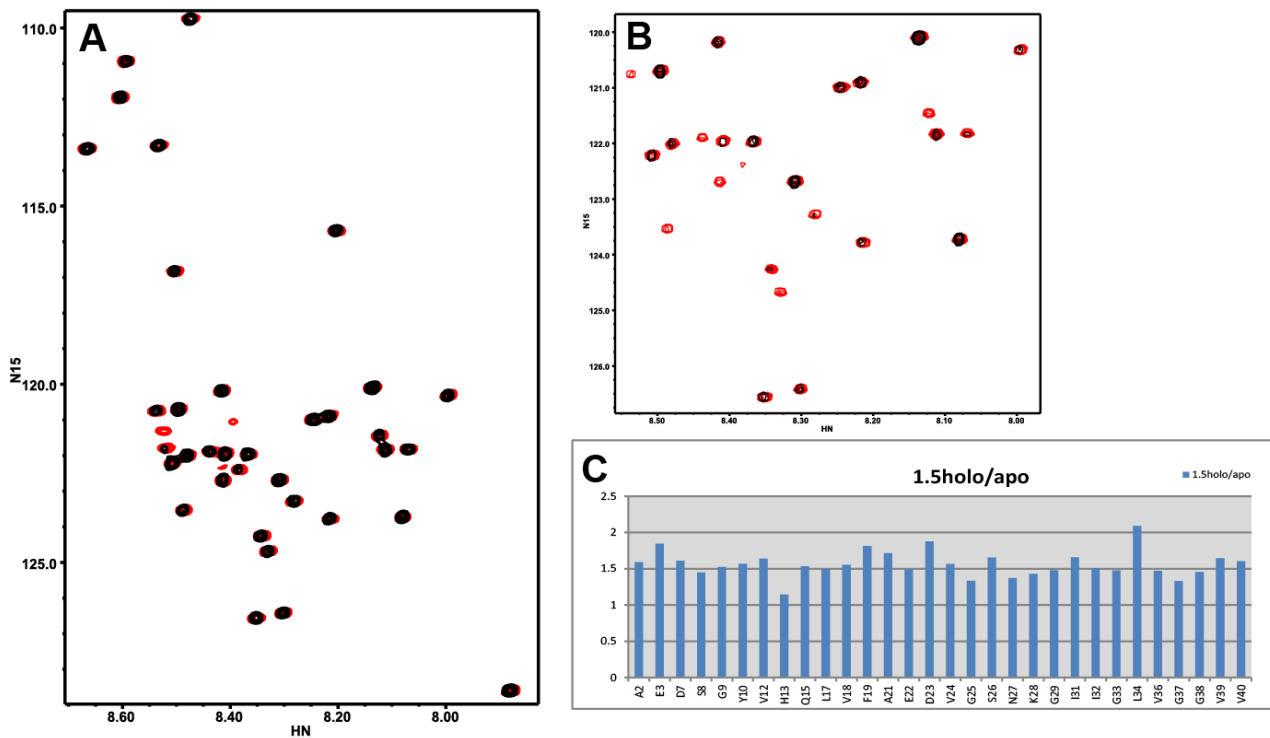

**Figure S6.** HSQC spectra of  $^{15}\text{N}$ -A $\beta_{1-40}$  (black) and  $^{15}\text{N}$ -A $\beta_{1-40}$  plus **1** (1.5 eq.) (red). (a) Full spectrum. (b) Expansion of the central region of the spectrum, plotted at higher contour levels than in panel (a) to emphasize the stronger intensities of the red cross-peaks compared to the corresponding black cross-peaks. (c) Changes in the HSQC cross-peak intensities of the A $\beta_{1-40}$  peptide caused by addition of **1** (1.5 eq.). The ratios between the cross-peak intensities of the A $\beta_{1-40}$  peptide plus 1.5 eq. of **1** ( $I_1$ ) and those of the A $\beta_{1-40}$  peptide alone ( $I_0$ ) are plotted as a function of the residue number.

## Details of Spectrophotometric determination of $K$ ( $\text{mM}^{-1}$ ) for cyclen and **1**.

Our data were examined using the one-to-one binding stoichiometry model:  $\mathbf{M} + \mathbf{L} \rightleftharpoons \mathbf{ML}$ , where  $\mathbf{M}$ ,  $\mathbf{L}$  and  $\mathbf{ML}$  represent free copper, free ligand and copper-ligand complex, respectively. The binding constant,  $K$ , can then be expressed in terms of molar concentrations of each component:

$$K = \frac{[\mathbf{ML}]}{[\mathbf{M}][\mathbf{L}]} \quad (1)$$

where  $[\mathbf{M}]$ ,  $[\mathbf{L}]$  and  $[\mathbf{ML}]$  are the corresponding molar concentrations. The total copper concentration,  $C_{\mathbf{M}}$ , is related to  $[\mathbf{M}]$  by the mass balance  $C_{\mathbf{M}} = [\mathbf{M}] + [\mathbf{ML}]$  and the total ligand concentration  $C_{\mathbf{L}}$  to  $[\mathbf{L}]$  by the mass balance  $C_{\mathbf{L}} = [\mathbf{L}] + [\mathbf{ML}]$ .

In order to express  $[\mathbf{M}]$  as a function of  $K$ ,  $C_{\mathbf{M}}$  and  $C_{\mathbf{L}}$ , it is useful to start by relating the fraction of copper-ligand complex,  $\left(\frac{[\mathbf{ML}]}{C_{\mathbf{L}}}\right)$ , to the binding constant using equation 1 and the previous mass balances:

$$\frac{C_{\mathbf{M}} - [\mathbf{M}]}{C_{\mathbf{L}}} = \frac{K[\mathbf{M}]}{1 + K[\mathbf{M}]} \quad (2)$$

Equation 2 can be rearranged as a quadratic equation with respect to  $[\mathbf{M}]$  and its positive root can be calculated:

$$[\mathbf{M}] = \frac{-(1 - KC_{\mathbf{M}} + KC_{\mathbf{L}}) + \sqrt{(1 - KC_{\mathbf{M}} + KC_{\mathbf{L}})^2 + 4KC_{\mathbf{M}}}}{2K} \quad (3)$$

At a given wavelength, the copper extinction coefficient,  $\varepsilon$ , in the presence of ligand, can be expressed as the weighted average between that of the free copper ions,  $\varepsilon_{\text{free}}$ , and bound copper,  $\varepsilon_{\text{bound}}$ , according to:

$$\varepsilon = \frac{[\mathbf{M}]}{C_{\mathbf{M}}} \varepsilon_{\text{free}} + \frac{[\mathbf{ML}]}{C_{\mathbf{M}}} \varepsilon_{\text{bound}} \quad (4)$$

In equation 4, it is useful to define  $[\mathbf{M}]/C_{\mathbf{M}}$  as the fraction of free copper ions in solution,  $\alpha_{\text{free}}$ . Therefore, we can rewrite equation 4 and express  $\varepsilon/\varepsilon_{\text{free}}$  as a function of  $\alpha_{\text{free}}$ .

$$\frac{\varepsilon}{\varepsilon_{\text{free}}} = \alpha_{\text{free}} + (1 - \alpha_{\text{free}})R \quad (3)$$

where and  $R = \varepsilon_{\text{bound}}/\varepsilon_{\text{free}}$  and

$$\alpha_{\text{free}} = \frac{-(1 - KC_{\mathbf{M}} + KC_{\mathbf{L}}) + \sqrt{(1 - KC_{\mathbf{M}} + KC_{\mathbf{L}})^2 + 4KC_{\mathbf{M}}}}{2KC_{\mathbf{M}}} \quad (4)$$

The method of least squares (using KaleidaGraph software) based on equations 3 and 4 was applied to our experimental data to determine  $K$  and  $R$  (Table S3). The accuracy of the prepared **1** solutions concentration was assessed by substituting in equation (4)  $C_{\mathbf{L}}$  with  $fC'_{\mathbf{L}}$ , where  $C'_{\mathbf{L}}$  is the measured **1** concentration by weight and  $f$  is a corrective factor that takes into account that part of the total weighed material is impurity; hence,  $f \leq 1$ . This value of  $f$  is consistent with the actual concentration value extracted from NMR, being approximately 10% lower than that determined by sample weight.

**Table S3.** Fitting model parameters associated with copper-ligand binding.

|                    | Cyclen <sup>1</sup> | <b>1</b> <sup>1</sup> |
|--------------------|---------------------|-----------------------|
| $K/\text{mM}^{-1}$ | >100                | 6.4±1.7               |
| $R$                | 179±1               | 14.7±0.2              |
| $f$                | 1.05±0.01           | 0.88±0.02             |

<sup>1</sup>the uncertainties are standard deviations.
